# Supplementary material
Source: PubMed Central journal article supplement (PMC2876335)
Supplement: NIHMS201094-supplement-04.pdf [file NIHMS201094-supplement-04.pdf]

Type of file: table

Label: SuppTable

Filename: supp table.doc

Supplementary Table 1. Closure angles (°) of GluK1-LBC from 4-14 ns molecular dynamics simulations

| Ligand          | Chain ID | Average | Max  | Min  | Median | Standard deviation |
|-----------------|----------|---------|------|------|--------|--------------------|
| apo             | A        | 28      | 31.7 | 24.4 | 28.1   | 1.7                |
|                 | B        | 29.3    | 32.7 | 25.1 | 29.4   | 1.9                |
| (S)-glutamate   | A        | 29.3    | 31.7 | 27   | 29.2   | 1.3                |
|                 | B        | 30.4    | 33   | 27.5 | 30.5   | 1.4                |
| neoDH           | A        | 27.6    | 30.7 | 24   | 27.7   | 1.6                |
|                 | B        | 28.5    | 31.9 | 24.8 | 28.6   | 1.6                |
| 9-F-8-epi-neoDH | A        | 29.7    | 32.8 | 25.2 | 30     | 1.9                |
|                 | B        | 28.9    | 32.2 | 25.6 | 28.9   | 1.5                |
| MSVIII-19       | A        | 30.6    | 35.6 | 25.5 | 30.6   | 1.8                |
|                 | B        | 28.9    | 34.3 | 26.6 | 28.6   | 1.6                |
| 8-deoxy-neoDH   | A        | 29.1    | 31.9 | 26.4 | 29     | 1.4                |
|                 | B        | 28      | 31.4 | 24.6 | 27.8   | 1.8                |
| 9-deoxy-neoDH   | A        | 28.3    | 33.2 | 24.8 | 28.1   | 1.8                |
|                 | B        | 26.6    | 31.6 | 20.9 | 26.2   | 3.1                |
| 8-epi-neoDH     | A        | 29.8    | 32.7 | 26.8 | 29.9   | 1.3                |
|                 | B        | 27.4    | 30.7 | 21.1 | 27.6   | 1.6                |
| 9-epi-neoDH     | A        | 28.9    | 32.4 | 26.1 | 28.6   | 1.4                |
|                 | B        | 29.8    | 33.5 | 26.3 | 29.7   | 1.7                |
| 8,9-epi-neoDH   | A        | 29      | 32.6 | 24.6 | 28.9   | 1.6                |
|                 | B        | 27.1    | 31.9 | 14.8 | 27.3   | 2.6                |

|               |   |      |      |      |      |     |
|---------------|---|------|------|------|------|-----|
| 4-epi-neoDH   | A | 28.6 | 30.7 | 24.8 | 28.8 | 1.4 |
|               | B | 27.8 | 31.4 | 23.9 | 27.5 | 1.6 |
| 2,4-epi-neoDH | A | 25.5 | 29.7 | 15.8 | 26.4 | 3.1 |
|               | B | 25.1 | 31.2 | 18.9 | 25.1 | 2.7 |
